# Supplementary material
Source: PubMed Central journal article supplement (PMC10991619)
Supplement: 262_2021_2899_MOESM1_ESM.pdf [file 262_2021_2899_MOESM1_ESM.pdf]

## Supplementary Appendix

### Supplementary tables

Supplementary Table 1. Patient characteristics

Supplementary Table 2. Overview of antibodies in flow cytometry analyses.

### Supplemental Figures

Figure S1. Gating strategy and phenotype of *ex vivo*-generated cDC21s, cDC2s and pDCs.

Figure S2. Sorting strategy *ex vivo*-generated and *in vivo* DC subsets.

Figure S3. *Ex vivo*-generated cDC2s and pDCs possess phenotypic and functional resemblance with their *in vivo* counterparts

Figure S4. *Ex vivo*-generated cDC2s and/or cDC1s possess LN homing capacity, efficiently induce alloreactive T cell proliferation and boost expansion of tumor-reactive T cells.

Figure S5. Short and long-peptide titration, control conditions in antigen cross-presentation assays and antigen cross-presentation by *ex vivo*-generated cDC2s.

Figure S6. *Ex vivo*-generated cDC1s and cDC2s enhance NK cell-mediated anti-leukemic reactivity.

Supplemental tables

Supplementary Table 1. Patient characteristics

| Patient | Disease                     | Sample time point  | Sample type | Extra information              | MiHA  | % MiHA-specific T cells day 0 |
|---------|-----------------------------|--------------------|-------------|--------------------------------|-------|-------------------------------|
| A       | Multiple myeloma            | 22 mo post alloSCT | PB          | DLI: 6 mo post alloSCT         | HA-1  | 0.06                          |
| B       | Myeloid dysplastic syndrome | 9 mo post alloSCT  | PB          | -                              | HA-1  | 0.25                          |
| C       | Acute myeloid leukemia      | 12 mo post alloSCT | PB          | -                              | HA-1  | 0.02                          |
| D       | Myeloid dysplastic syndrome | 9 mo post alloSCT  | PB          | DLI: 4 mo post alloSCT         | LRH-1 | 0.05                          |
| E       | Acute myeloid leukemia      | 36 mo post alloSCT | PB          | -                              | LRH-1 | 0.02                          |
| F       | Acute myeloid leukemia      | 76 mo post alloSCT | PB          | DLI: 13 and 36 mo post alloSCT | LRH-1 | 0.03                          |
| G       | Myeloid dysplastic syndrome | 3 mon post alloSCT | PB          | -                              | HA-1  | < 0.01                        |
| H       | Acute myeloid leukemia M0   | Diagnosis          | BM          | -                              | -     | -                             |
| I       | Acute myeloid leukemia M1   | Diagnosis          | BM          | -                              | -     | -                             |
| J       | Acute myeloid leukemia M2   | Diagnosis          | BM          | -                              | -     | -                             |
| K       | Acute myeloid leukemia M0   | Diagnosis          | BM          | -                              | -     | -                             |

Mo, months; DLI, donor lymphocyte infusion; alloSCT, allogeneic stem cell transplantation; MiHA; Minor histocompatibility antigen



**Supplementary Table 2. Overview of used antibodies in flow cytometry analyses.**

| Specificity                                            | Fluorochrome | Clone   | Isotype | Company         | Cat#       |
|--------------------------------------------------------|--------------|---------|---------|-----------------|------------|
| <b>HPC Purity</b>                                      |              |         |         |                 |            |
| CD34                                                   | PE-Cy7       | 581.0   | IgG1κ   | Biologend       | A21691     |
| CD45                                                   | ECD          | J.33    | IgG1κ   | Beckman Coulter | A007784    |
| <b>Phenotype and sort <i>ex vivo</i> generated DCs</b> |              |         |         |                 |            |
| CD1c                                                   | APC-Cy7      | L161    | IgG1κ   | Biologend       | 331520     |
| CD14                                                   | PE-Cy7       | HCD14   | IgG1κ   | Biologend       | 325618     |
| CD123                                                  | BV510        | 6H6     | IgG1κ   | Biologend       | 306022     |
| CD141                                                  | APC          | M80     | IgG1κ   | Biologend       | 344106     |
| CD303                                                  | FITC         | 201A    | IgG2ak  | Biologend       | 353208     |
| CD370/CLEC9A                                           | PE           | 8F9     | IgG2a   | Biologend       | 353804     |
| HLA-DR                                                 | ECD          | Immu359 | IgG1κ   | Beckman Coulter | IM3636     |
| <b>Phenotype and sort <i>in vivo</i> DCs</b>           |              |         |         |                 |            |
| CD1c                                                   | PE-Cy7       | L161    | IgG1κ   | Biologend       | 331516     |
| CD11c                                                  | AF700        | Bu15    | IgG1κ   | Biologend       | 337220     |
| CD14                                                   | BV785        | M5F2    | IgG2ak  | Biologend       | 301841     |
| CD19                                                   | PE           | HIB19   | IgG1κ   | eBioscience     | 12-0193-82 |
| CD141                                                  | APC          | M80     | IgG1κ   | Biologend       | 344106     |
| CD303                                                  | FITC         | 201A    | IgG2ak  | Biologend       | 353208     |
| HLA-DR                                                 | APC Cy7      | G45-6   | IgG2ak  | BD Bioscience   | 335976     |
| <b>DC maturation assays</b>                            |              |         |         |                 |            |
| CD80                                                   | PE-Cy7       | L307.4  | IgG1κ   | BD Bioscience   | 561135     |
| CD83                                                   | PE           | HB15e   | IgG1κ   | Biologend       | 305308     |
| CD86                                                   | AF488        | IT2.2   | IgG2bk  | Biologend       | 305414     |
| CCR7                                                   | FITC         | G043H7  | IgG2ak  | Biologend       | 353216     |
| <b>Allogeneic T cell proliferation assays</b>          |              |         |         |                 |            |
| CD3                                                    | PE-Cy7       | UCHT1   | IgG1κ   | Biologend       | 300420     |
| CD8                                                    | AF700        | RPA-T8  | IgG2ak  | Invitrogen      | MCHD0829   |
| <b>Antigen-specific T cell expansion assays</b>        |              |         |         |                 |            |
| CD3                                                    | PE-Cy7       | UCHT1   | IgG1κ   | Biologend       | 300420     |
| CD8                                                    | AF700        | RPA-T8  | IgG2ak  | Invitrogen      | MCHD0829   |
| Tetramer                                               | PE           | -       | -       | Custom          |            |
| Tetramer                                               | APC          | -       | -       | Custom          |            |
| <b>Cross-presentation assays</b>                       |              |         |         |                 |            |
| CD8                                                    | AF700        | RPA-T8  | IgG2ak  | Invitrogen      | MCHD0829   |

|                               |            |       |               |               |            |
|-------------------------------|------------|-------|---------------|---------------|------------|
| CD69                          | BV421      | FN50  | IgG1 $\kappa$ | Biolegend     | 310930     |
| CD107a                        | PE Cy7     | H4A3  | IgG1 $\kappa$ | Biolegend     | 328618     |
| CD137                         | APC        | 4B4-1 | IgG1 $\kappa$ | BD Bioscience | 550890     |
| IFN- $\gamma$ (intracellular) | FITC       | B27   | IgG1 $\kappa$ | BD Bioscience | 554700     |
| TNF- $\alpha$ (intracellular) | PE         | MAB11 | IgG1 $\kappa$ | BD Bioscience | 554513     |
| <b>NK cell assays</b>         |            |       |               |               |            |
| CD69                          | FITC       | FN50  | IgG1 $\kappa$ | Biolegend     | 310904     |
| CD107a                        | PE-Cy7     | H4A3  | IgG1 $\kappa$ | Biolegend     | 328618     |
| TRAIL/CD253                   | APC        | RIK-2 | IgG1 $\kappa$ | Biolegend     | 308210     |
| <b>Viability Dyes</b>         |            |       |               |               |            |
| -                             | Sytox Blue | -     | -             | Invitrogen    | S34857     |
| -                             | 7-AAD      | -     | -             | Sigma Aldrich | A9400      |
| -                             | eFluor780  | -     | -             | Thermo Fisher | 65-0865-14 |
| -                             | DAPI       | -     | -             | Sigma Aldrich | D9532-50MG |

Data acquisition and analyses were performed using Gallios or FC500 flow cytometers and Kaluza version 2.1 software (all Beckman Coulter).

### Abbreviations

CD: Cluster of differentiation

HPC: Hematopoietic progenitor cell

PE: Phycoerythrin

Cy: Cyanine

ECD: Electron coupled dye (PE-Texas red)

APC: Allophycocyanin

BV: Brilliant violet

FITC: Fluorescein

AF: Alexa fluor

# Supplemental Figure 1

**A**

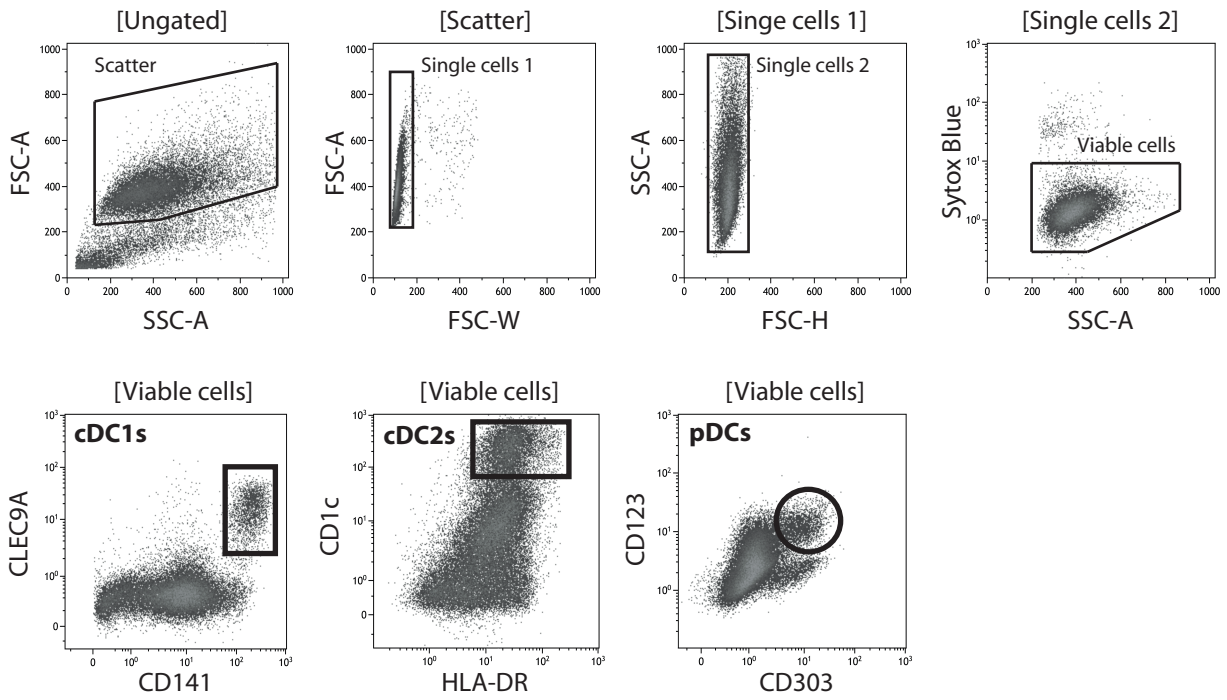

**B**

## *Ex vivo*-generated cDC1s

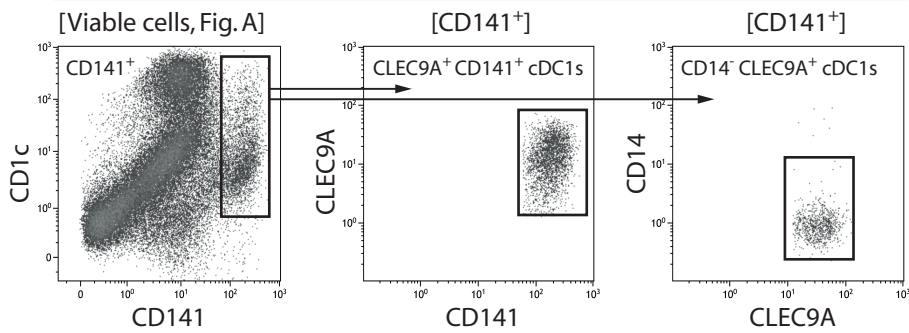

**C**

## *Ex vivo*-generated cDC2s

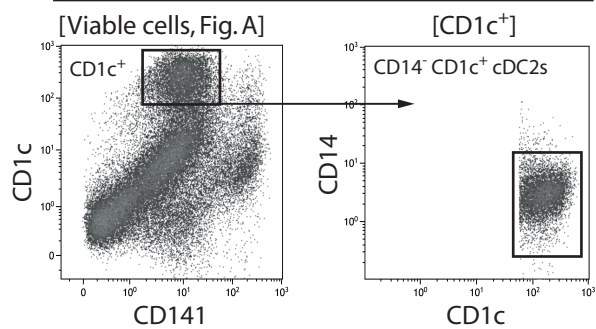

**D**

## *Ex vivo*-generated pDCs

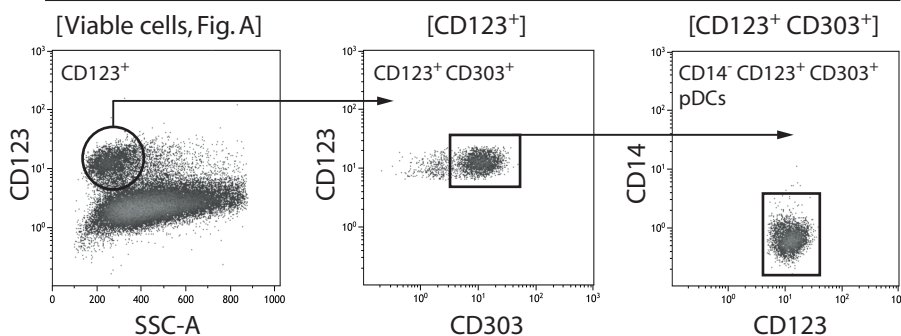

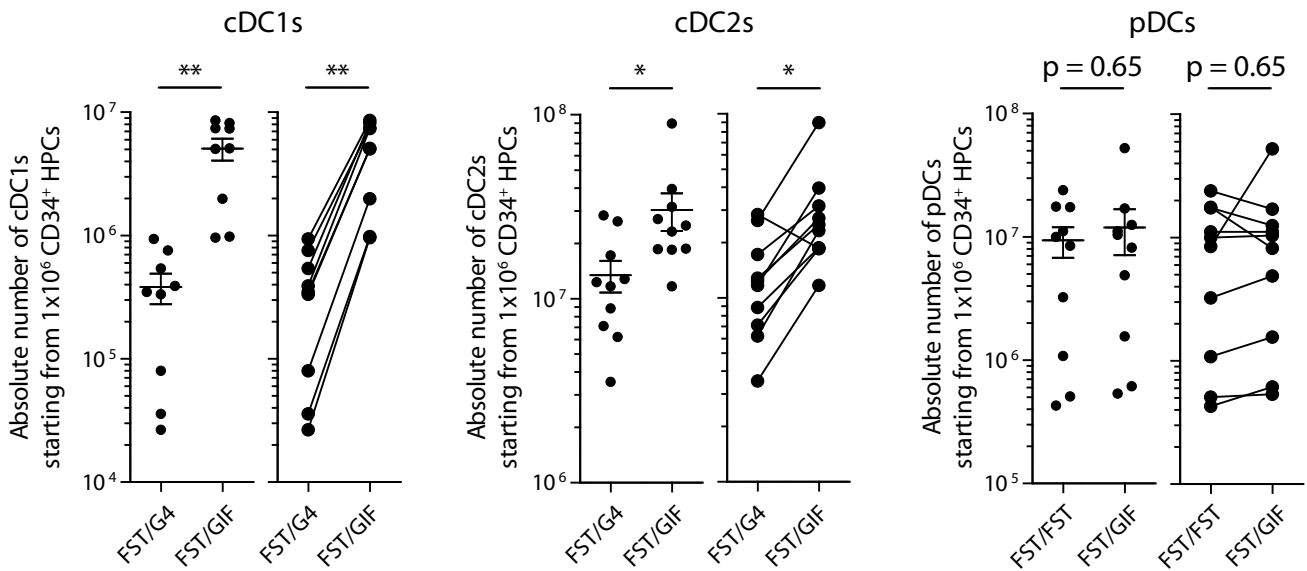

**Supplementary Figure 1. Gating strategy and phenotype of *ex vivo*-generated cDC1s, cDC2s and pDCs.** (A) Dot plots of a representative FST/GIF *ex vivo* HPC-DC culture showing gating strategy of HPC-derived DC subsets within total cultured cells. Cells are gated based on forward- and side scatter, doublets (FCS-A/SSC-A versus FCS-W/FCS-H) and dead cells (sytox blue positive) were excluded, followed by gating on the particular HPC-derived DC subsets using CLEC9A and CD141 for cDC1s, CD1c and HLA-DR for cDC2s and CD123 and CD303 for pDCs. (B-D) All *ex vivo*-generated DC subsets are CD14<sup>-</sup>. (E) Absolute number of *ex vivo*-generated cDC1s, cDC2s and pDCs in the FST/GIF culture compared with previously reported FST/G4 and FST/FST culture protocols (18).

## Supplemental Figure 2

**A**

### *In vivo*-derived DC subsets

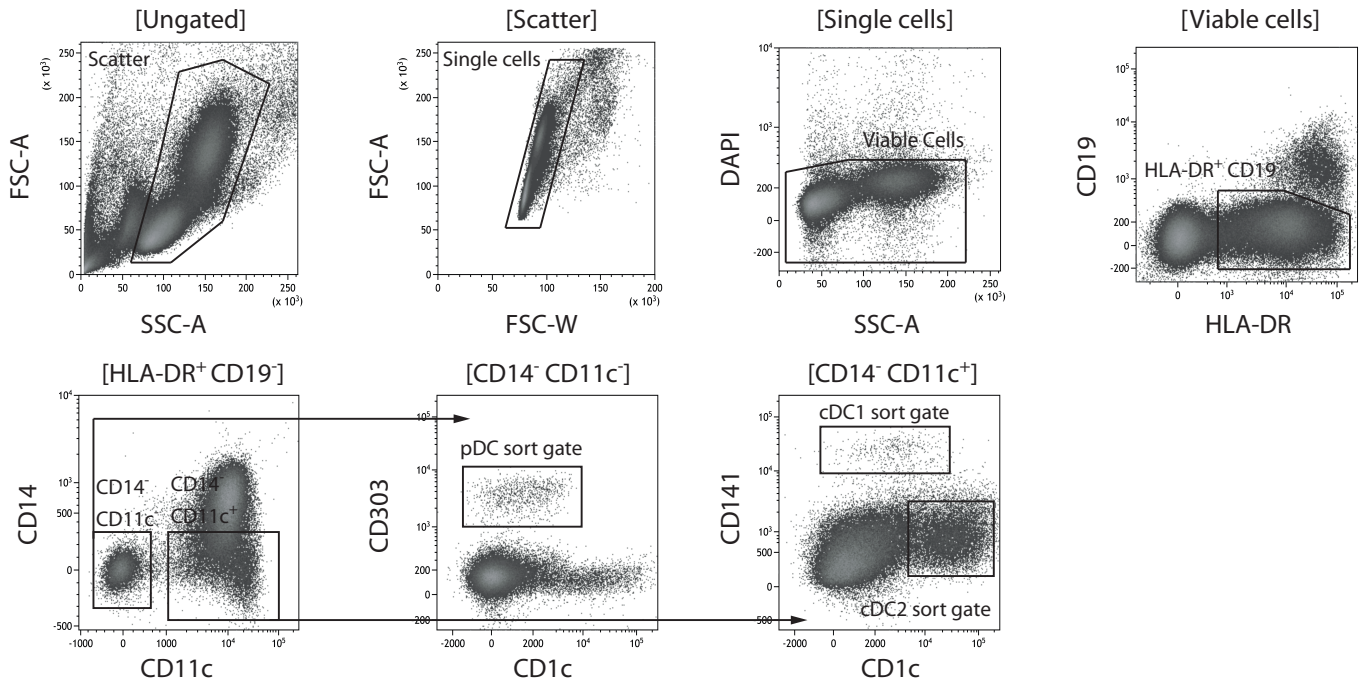

### *Ex vivo*-generated DC subsets

**B**

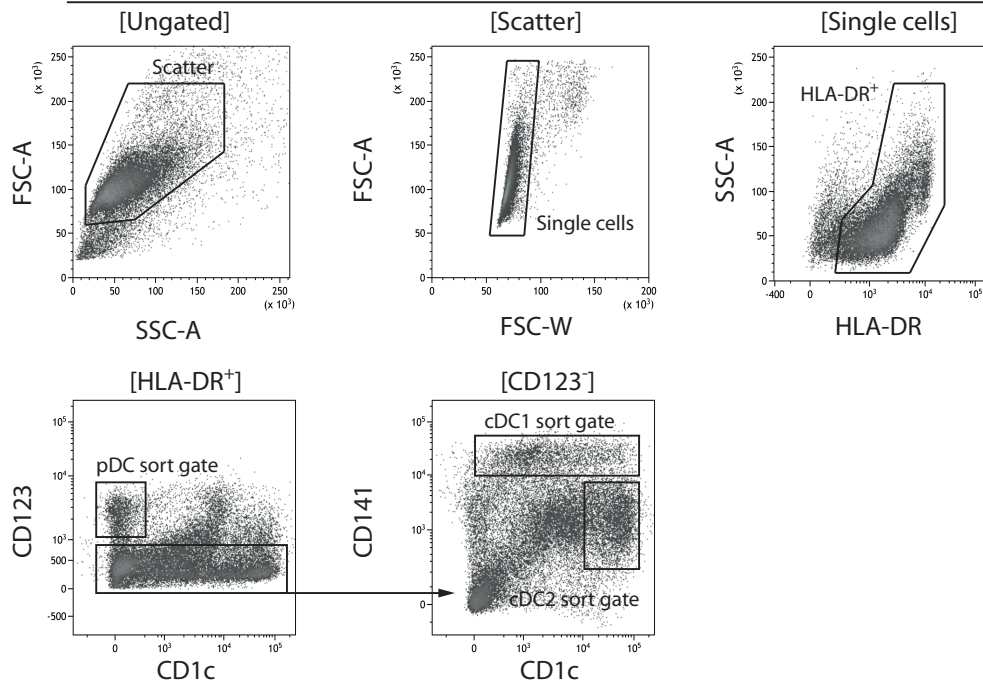

**Supplemental Figure 2. Sort strategy *ex vivo*-generated- and *in vivo* DC subsets.** (A-B) Dot plots of representative sorting strategy of *in vivo*-derived- (A) and *ex vivo*-generated (B) DC subsets.

# Supplemental Figure 3

**A**

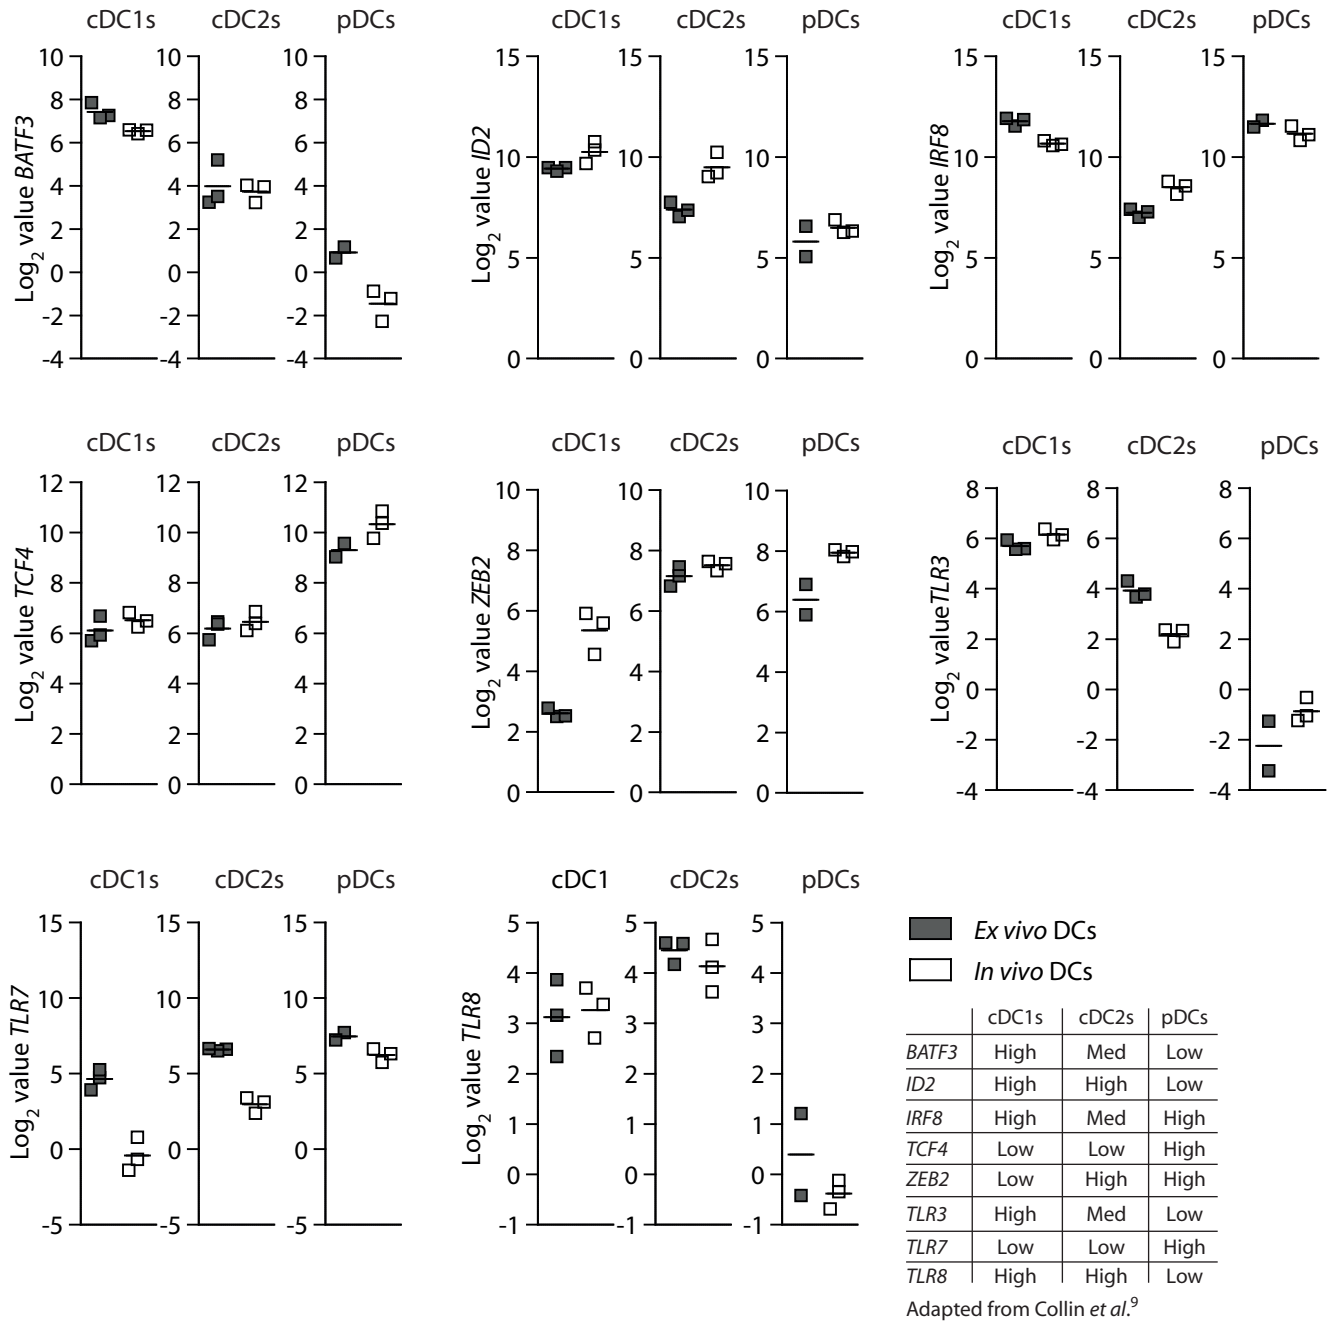

**B**

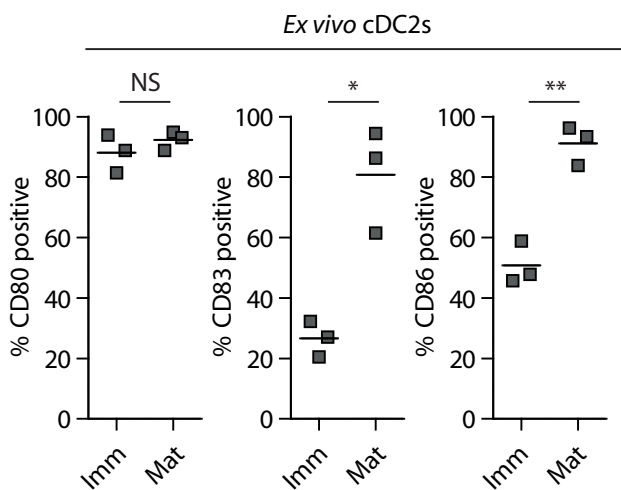

**C**

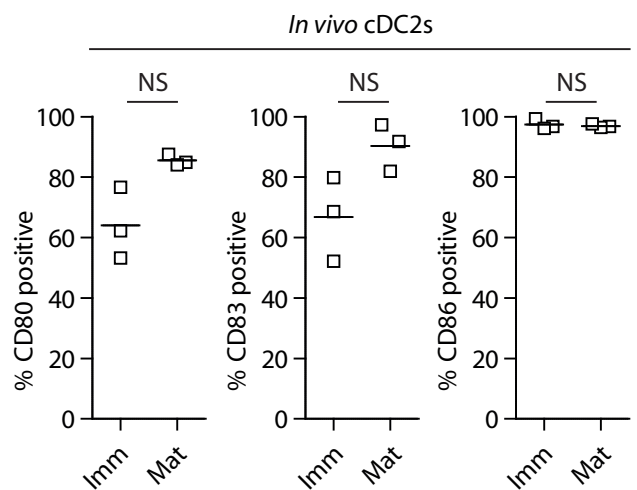

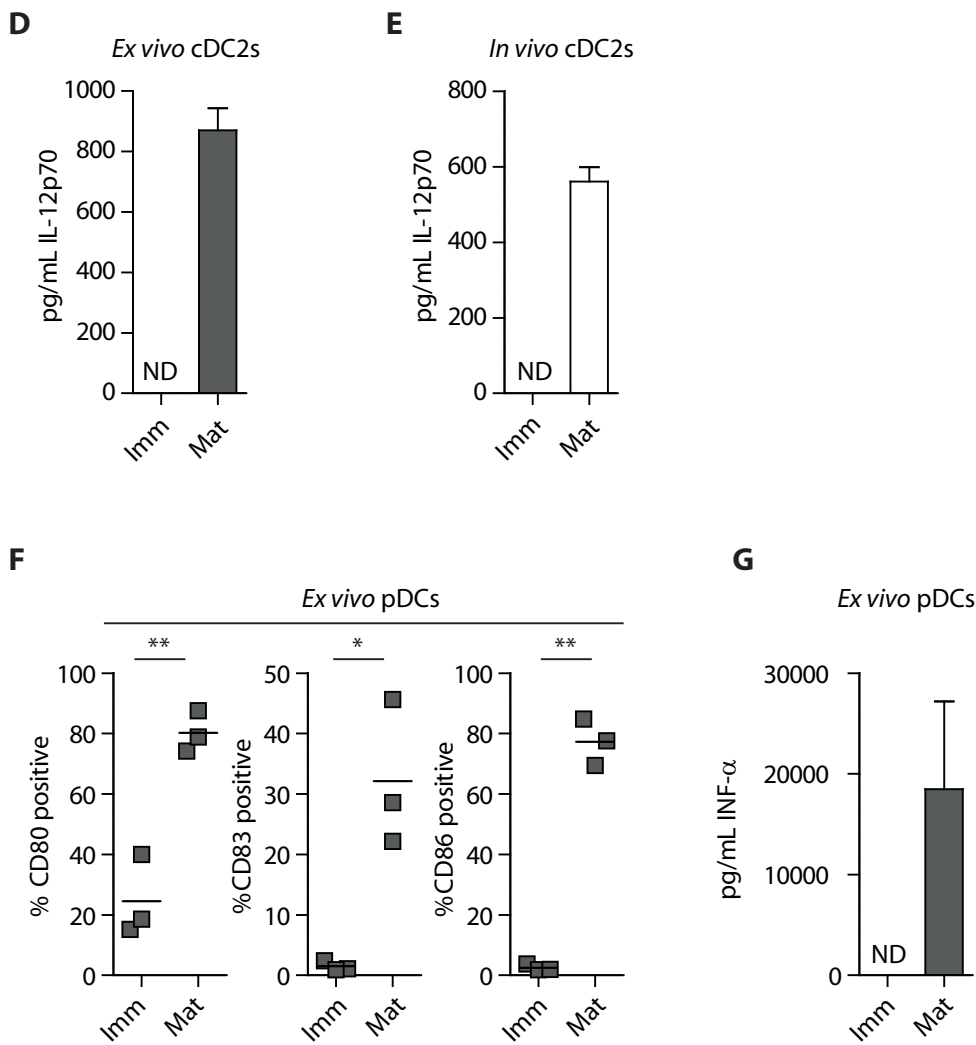

**Supplementary Figure 3. *Ex vivo*-generated cDC2 and pDCs possess phenotypic and functional resemblance with their *in vivo* counterpart.** (A) Expression of cDC1, cDC2 and pDC-related transcription factors and TLRs. (B-C) Expression of co-stimulatory molecules CD80, CD83 and CD86 on immature and mature *ex vivo*-generated (B) and *in vivo* cDC2s (C). (D-E) Release of pro-inflammatory cytokine IL12p70 by immature and mature *ex vivo*-generated (D) and *in vivo* cDC2s (E). (F-G) Expression of co-stimulatory molecules CD80, CD83 and CD86 on immature and mature *ex vivo*-generated pDCs. (G) Release of pro-inflammatory cytokine IFN- $\alpha$  by immature and mature *ex vivo*-generated pDCs. Data is shown as mean  $\pm$  SEM (n=3). Statistical analysis was performed using paired T-test (B). TLR, toll like receptor. \*\*\* P < 0.001, \*\* P < 0.01. ND, non-detectable; SEM, standard error of the mean.

## Supplemental Figure 4

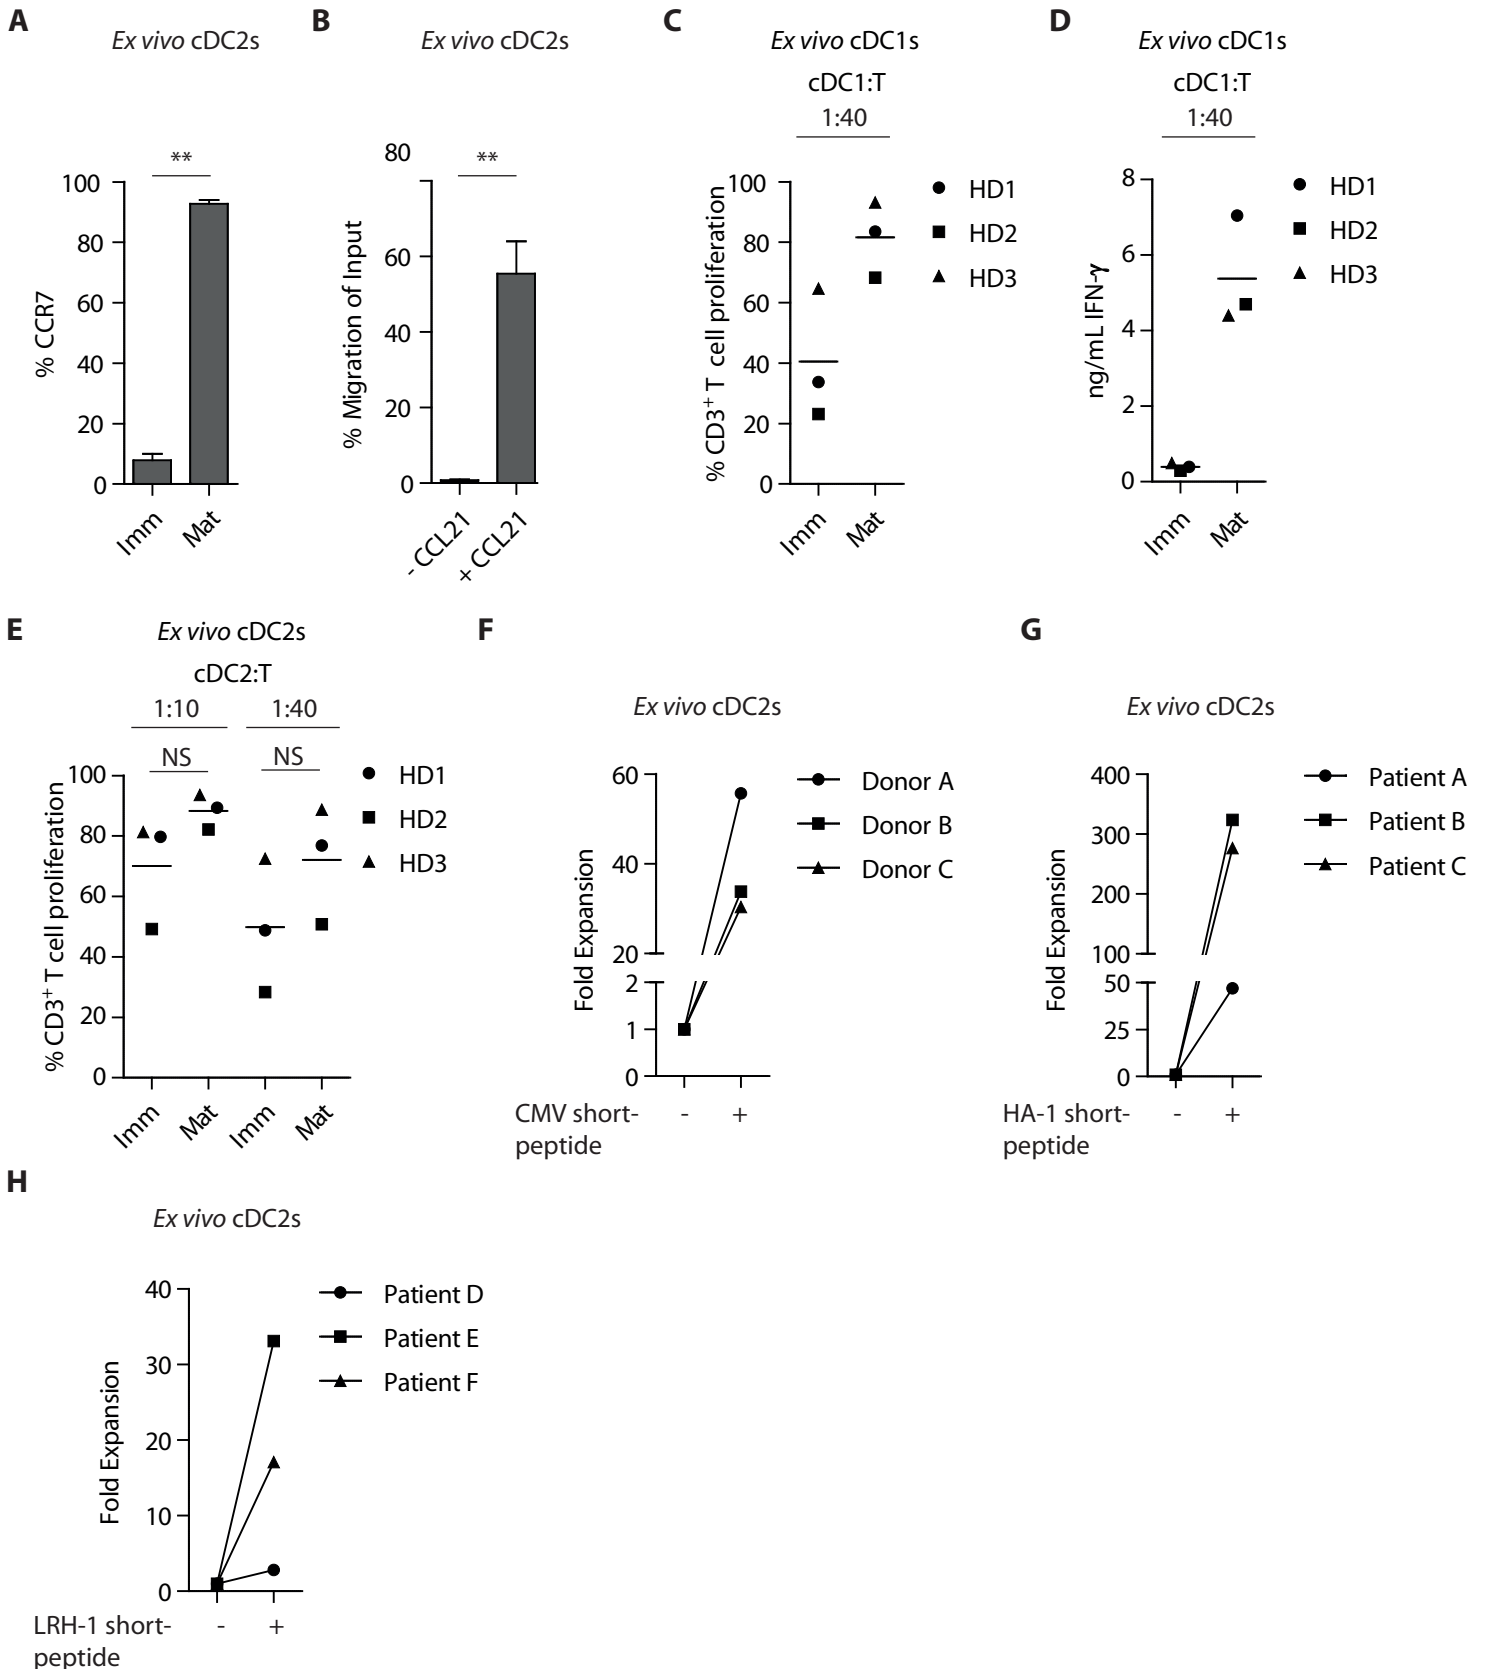

**Supplementary Figure 4. *Ex vivo*-generated cDC2s and/or cDC1s possess LN homing capacity, efficiently induce alloreactive T cell proliferation and boost expansion of tumor-reactive T cells.** (A) Expression of LN homing chemokine receptor CCR7 on immature and mature *ex vivo*-generated cDC2s. Data is shown as mean  $\pm$  SEM (n=3). (B) Percentage of *ex vivo*-generated cDC2 migration to LN homing chemokine CCL21 (250 ng/mL). Data is shown as mean  $\pm$  SEM (n=3). (C, E) Percentage of allogeneic T cell proliferation at day 5 of culture induced by *ex vivo*-generated cDC1s (C) or *ex vivo*-generated cDC2s (E) using cDC:T cell ratio of 1:10 or 1:40 respectively. Lines indicate mean value (n=3). (D) Release of IFN- $\gamma$  upon 5 days T cell stimulation using *ex vivo*-generated cDC1s in alloMLRs using a cDC1:T cell ratio of 1:40. Line indicate mean value (n=3). (F-H) Fold expansion of CMV, HA-1- and LRH-1 specific CD8<sup>+</sup> T cell induced by short-peptide-pulsed *ex vivo*-generated cDC2s. Statistical analyses was performed using an unpaired T test (A, C-D) or paired T test (B) LN, lymph node; CCR7, C-C chemokine receptor 7; CCL21, C-C motif chemokine ligand 21; AlloMLRs, allogeneic mixed leukocyte reactions; SEM, standard error of the mean. \*\* P<0.05.



## Supplemental Figure 5

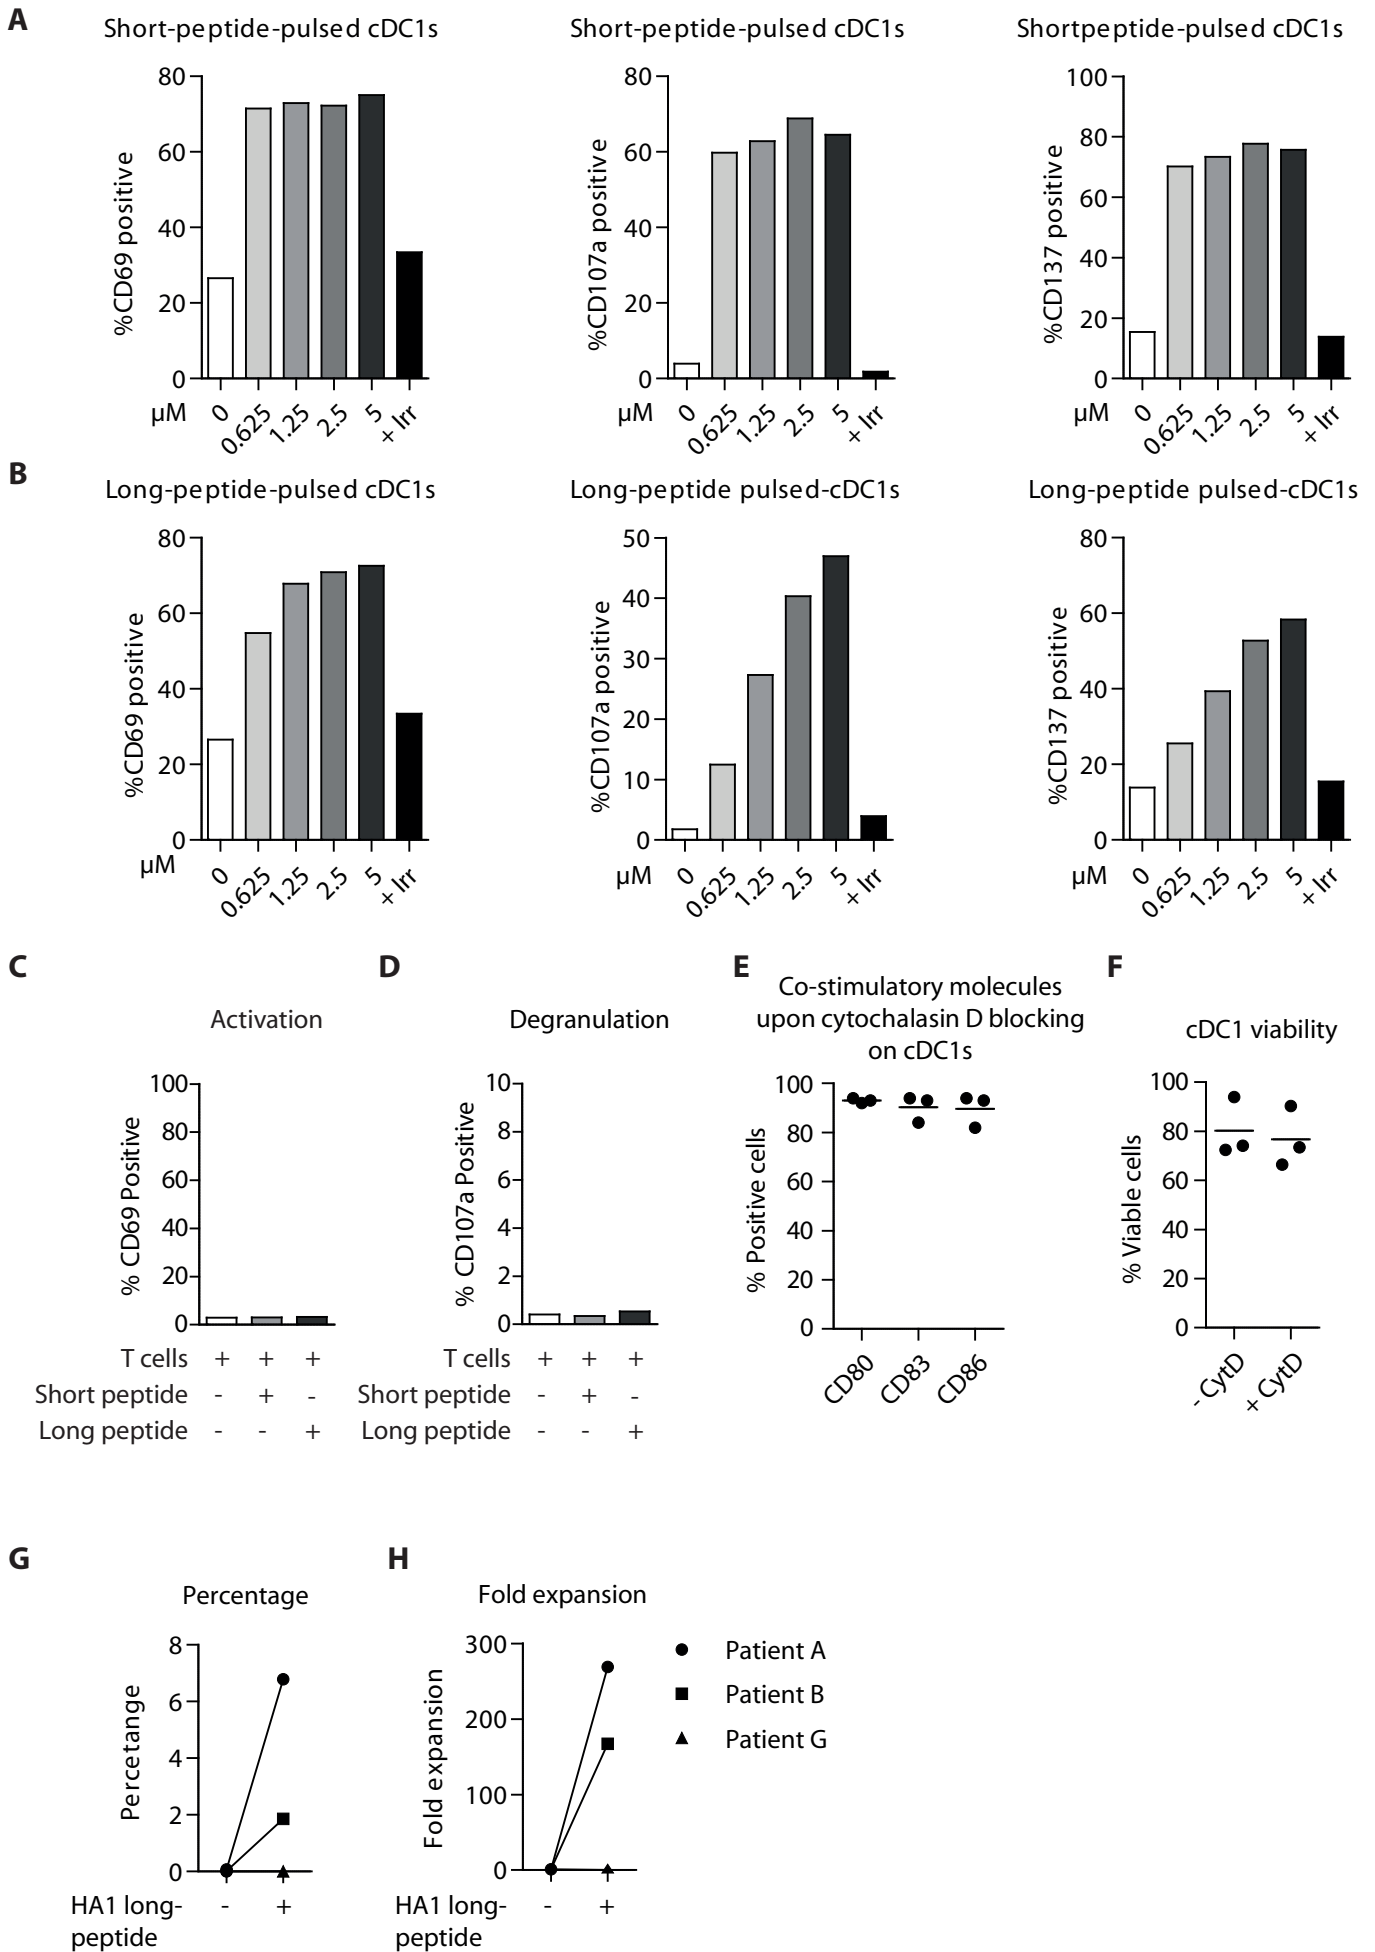

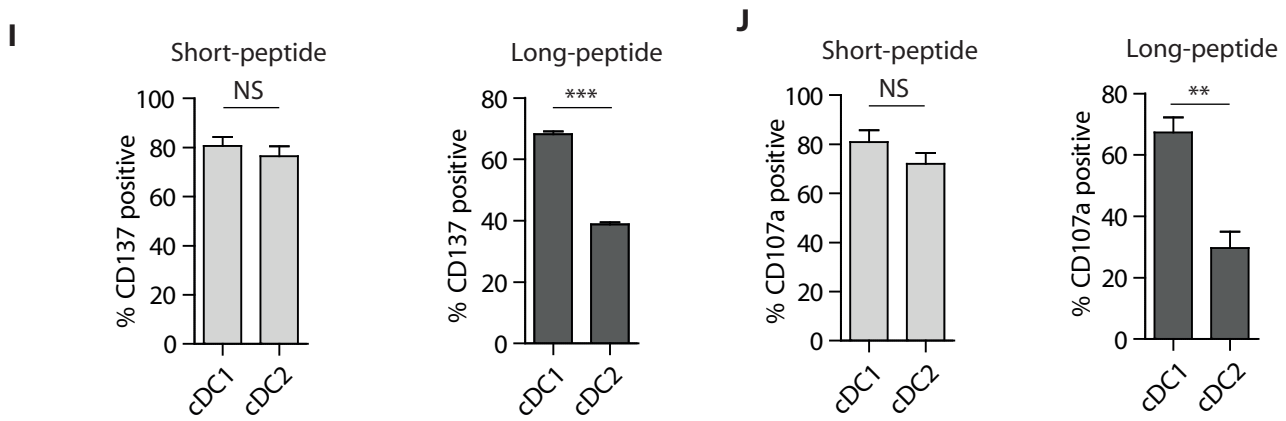

**Supplementary Figure 5. Short- and long-peptide titration, control conditions in antigen cross-presentation assays and antigen cross-presentation by *ex vivo*-generated cDC2s.**

(A-B) Activation shown by expression of CD69, CD107a and CD137 of HA-1 T cell receptor (TCR) transduced T cells by cDC1s pulsed with different concentration of short- and long HA-1 peptide. (C-D) Expression of activation marker CD69 (A) and T cell degranulation (B) by HA-1 TCR-transduced T cells in the absence of *ex vivo*-generated cDC1s or presence of HA-1 short- or HA-1 long-peptide only. (E-F) Expression of co-stimulatory molecules CD80, CD83 and CD86 on *ex vivo*-generated cDC1s treated with CytD. Lines indicate mean value (n=3). (D) Viability of *ex vivo*-generated cDC1s treated with/without CytD. Lines incubate mean value (n=3). (G-H) Percentage and fold expansion of patient-derived HA-1-specific T cells induced by long-peptide pulsed cDC2s. (I-J) Graphs showing CD137 expression and degranulation (CD107a expression) by HA-1-transduced TCR T cells induced by short -or long-peptide-pulsed cDC1s and cDC2s. Irr, irrelevant peptide; CytD, cytochalasin D.

# Supplemental Figure 6

**A**

NK cells + IL-15

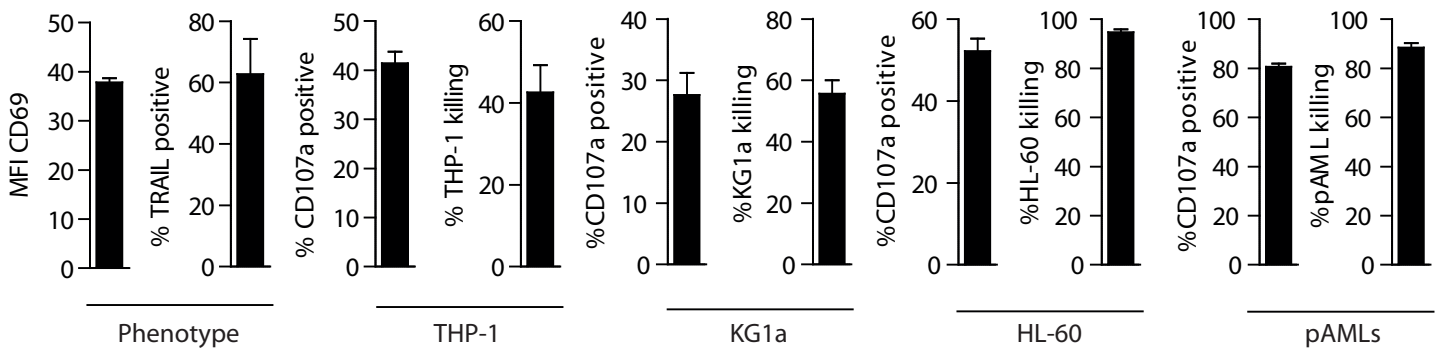

**B**

Activation

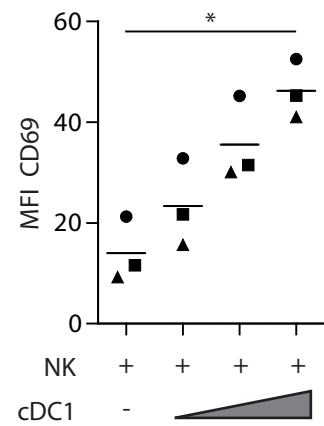

Activation

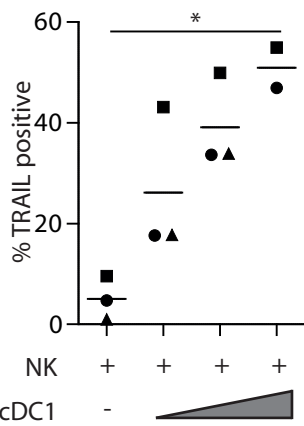

**C**

Degranulation

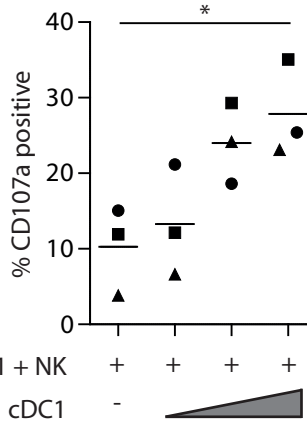

**D**

THP-1 killing

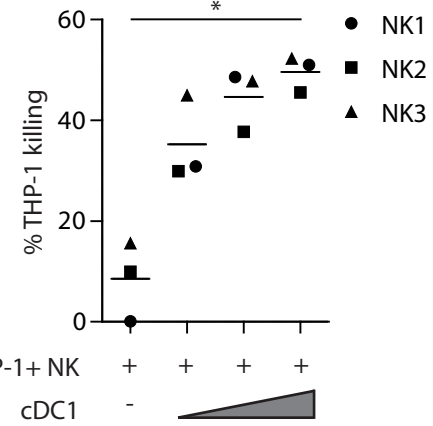

**E**

Activation

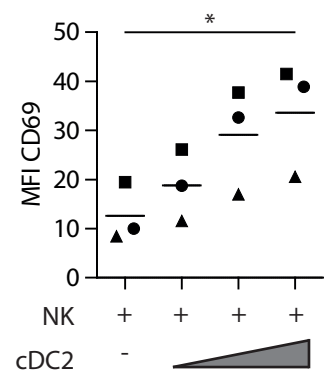

Activation

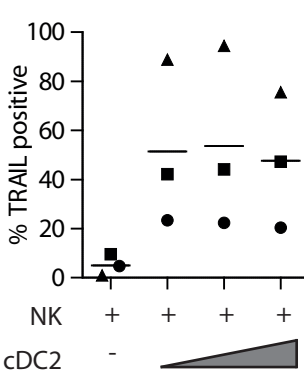

**F**

Degranulation

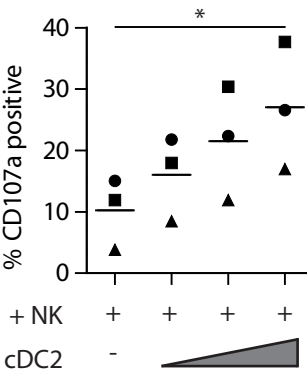

**G**

Killing

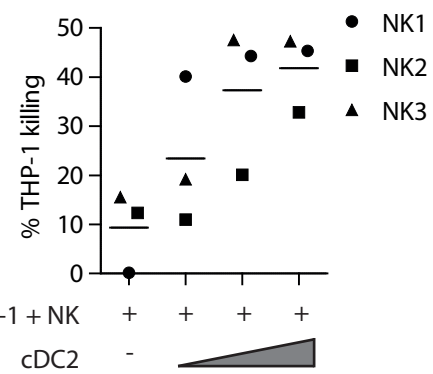

**H**

Degranulation KG1a

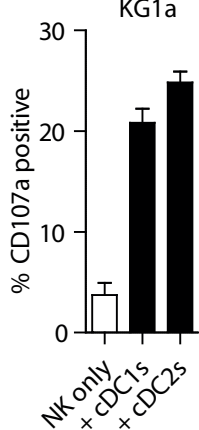

**I**

KG1a killing

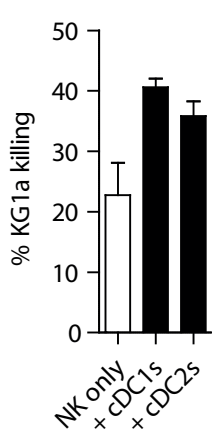

**J**

Degranulation HL-60

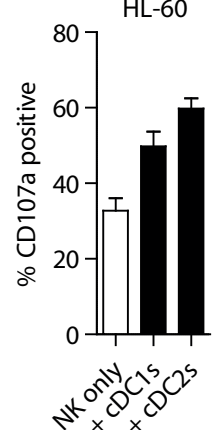

**K**

HL-60 killing

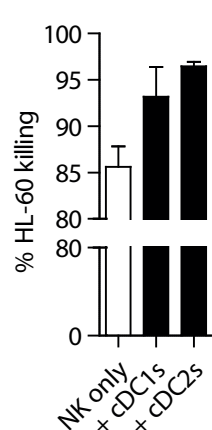

**L**

Degranulation pAML

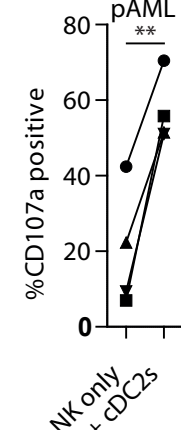

**M**

pAML killing

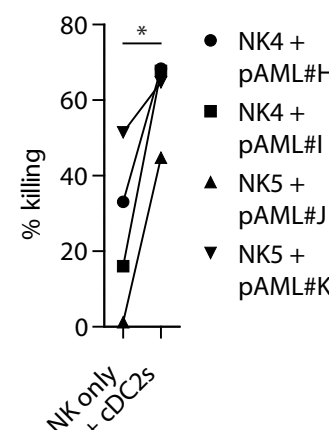

- NK4 + pAML#H
- NK4 + pAML#I
- ▲ NK5 + pAML#J
- ▼ NK5 + pAML#K

**Supplementary Figure 6. *Ex vivo*-generated cDC1s and cDC2s enhance NK cell leukemia-reactivity.** (A) Expression of CD69 and TRAIL, degranulation and tumor cell killing by IL-15-activated NK cell. Data is shown as mean  $\pm$  SEM (n=3). (B, E) MFI of activation marker CD69 and percentage TRAIL expression on cDC1 and cDC2-activated NK cells after 48 hours co-cultured (cDC:NK cell ratios of 0.02:1, 0.2:5 and 1:1 respectively). Lines indicate mean value (n=3). (C, D, F, G) Degranulation (C, F) and THP-1 killing (D, G) by cDC1 and cDC2-activated NK cells 4 hours stimulated with THP-1 cells (NK cell:THP-1 cells ratio of 2:1). Lines indicate mean value. (H-K) Degranulation (H, J) and killing (I, K) by cDC1 and cDC2-activated NK cells 4 hours stimulated with KG1a (H-I) or HL-60 (J-K). (L, M) Degranulation by (L) and killing of pAML (M) by cDC2-activated NK cells 48 hours stimulated with primary AML cells. Statistical analyses was performed using Friedman test followed by Dunns post-hoc test (B, C, D, E and F) or paired T-test (L, M). \* P < 0.05. NK, natural killer; TRAIL, TNF-related apoptosis-inducing ligand; pAML, primary acute myeloid leukemia; MFI, median fluorescence intensity.
